# Supplementary material for: Comparison of national and international sedentary behaviour and physical activity guidelines for older adults: A systematic review and quality appraisal with AGREE II
Source: PubMed Central journal article supplement (PMC10681178; doi:10.1371/journal.pone.0294784), 2023-11-27
Supplement: pone.0294784.s002.pdf [file pone.0294784.s002.pdf]

**S1 Table. Search Strategy.**

| <b>Database: OVID Medline Epub Ahead of Print, In-Process &amp; Other Non-Indexed Citations, Ovid MEDLINE(R) Daily and Ovid MEDLINE(R) 1946 to Present</b> |                                                                                                                                     |
|------------------------------------------------------------------------------------------------------------------------------------------------------------|-------------------------------------------------------------------------------------------------------------------------------------|
| 1                                                                                                                                                          | Sedentary Behavior/ (13463)                                                                                                         |
| 2                                                                                                                                                          | (sedentary lifestyle* or sedentary life style* or sedentary time* or sedentary behavio?r* or physical inactivit*).ti,ab,kf. (26976) |
| 3                                                                                                                                                          | exp Overweight/ (269121)                                                                                                            |
| 4                                                                                                                                                          | (obes* or overweight*).ti,ab,kf. (400758)                                                                                           |
| 5                                                                                                                                                          | exp Exercise/ (244224)                                                                                                              |
| 6                                                                                                                                                          | (exercis* or physical activit*).ti,ab,kf. (471646)                                                                                  |
| 7                                                                                                                                                          | or/1-6 (958069)                                                                                                                     |
| 8                                                                                                                                                          | exp guideline/ (37617)                                                                                                              |
| 9                                                                                                                                                          | guideline*.pt. (16562)                                                                                                              |
| 10                                                                                                                                                         | practice guideline*.pt. (30368)                                                                                                     |
| 11                                                                                                                                                         | exp Consensus Development Conference/ (12653)                                                                                       |
| 12                                                                                                                                                         | exp Consensus Development Conference/ (12653)                                                                                       |
| 13                                                                                                                                                         | or/8-12 (47511)                                                                                                                     |
| 14                                                                                                                                                         | 7 and 13 (2030)                                                                                                                     |
| 15                                                                                                                                                         | exp Aged/ (3445994)                                                                                                                 |
| 16                                                                                                                                                         | (older adult* or senior* or elder*).ti,ab,kf. (450501)                                                                              |
| 17                                                                                                                                                         | 15 or 16 (3590530)                                                                                                                  |
| 18                                                                                                                                                         | 14 and 17 (232)                                                                                                                     |
| <b>Database: Embase &lt;1974 to 2023 May 01&gt;</b>                                                                                                        |                                                                                                                                     |
| 1                                                                                                                                                          | exp sedentary lifestyle/ (20096)                                                                                                    |
| 2                                                                                                                                                          | (sedentary behavio?r* or sedentary lifestyle* or sedentary life style* or physical inactivit*).ti,ab,kw. (33701)                    |
| 3                                                                                                                                                          | exp obesity/ (650887)                                                                                                               |
| 4                                                                                                                                                          | (obes* or overweight*).ti,ab,kw. (601263)                                                                                           |
| 5                                                                                                                                                          | exp exercise/ (425711)                                                                                                              |
| 6                                                                                                                                                          | exp physical activity/ (527311)                                                                                                     |
| 7                                                                                                                                                          | (exercis* or physical activit*).ti,ab,kw. (636384)                                                                                  |
| 8                                                                                                                                                          | or/1-7 (1737944)                                                                                                                    |
| 9                                                                                                                                                          | exp aged/ (3578983)                                                                                                                 |
| 10                                                                                                                                                         | (older adult* or senior* or elder*).ti,ab,kw. (629916)                                                                              |
| 11                                                                                                                                                         | exp practice guideline/ (707155)                                                                                                    |
| 12                                                                                                                                                         | exp consensus development/ (27341)                                                                                                  |
| 13                                                                                                                                                         | consensus development.pt. (0)                                                                                                       |
| 14                                                                                                                                                         | (consensus development or practice guideline*).ti,ab. (47586)                                                                       |
| 15                                                                                                                                                         | 9 or 10 (3765054)                                                                                                                   |
| 16                                                                                                                                                         | 11 or 12 or 13 or 14 (720227)                                                                                                       |
| 17                                                                                                                                                         | 8 and 15 and 16 (6996)                                                                                                              |
| 18                                                                                                                                                         | (review or preprint).pt. (3152027)                                                                                                  |
| 19                                                                                                                                                         | 17 not 18 (6189)                                                                                                                    |
| <b>Database: Global Health &lt;1910 to 2023 Week 17&gt;</b>                                                                                                |                                                                                                                                     |
| 1                                                                                                                                                          | exp obesity/ (151511)                                                                                                               |

|                                 |                                                                                                                                                                                                                                                                                                                                                                                                                                                                                                                                                                                                                                                                                                                                                                                                    |
|---------------------------------|----------------------------------------------------------------------------------------------------------------------------------------------------------------------------------------------------------------------------------------------------------------------------------------------------------------------------------------------------------------------------------------------------------------------------------------------------------------------------------------------------------------------------------------------------------------------------------------------------------------------------------------------------------------------------------------------------------------------------------------------------------------------------------------------------|
| 2                               | exp exercise/ (38706)                                                                                                                                                                                                                                                                                                                                                                                                                                                                                                                                                                                                                                                                                                                                                                              |
| 3                               | exp physical activity/ (84286)                                                                                                                                                                                                                                                                                                                                                                                                                                                                                                                                                                                                                                                                                                                                                                     |
| 4                               | sedentary behaviour/ (990)                                                                                                                                                                                                                                                                                                                                                                                                                                                                                                                                                                                                                                                                                                                                                                         |
| 5                               | (sedentary behavior?r* or sedentary lifestyle* or sedentary life style* or physical inactivit*).mp. (11479)                                                                                                                                                                                                                                                                                                                                                                                                                                                                                                                                                                                                                                                                                        |
| 6                               | (obes* or overweight* or exercis* or physical activit*).mp. (271477)                                                                                                                                                                                                                                                                                                                                                                                                                                                                                                                                                                                                                                                                                                                               |
| 7                               | or/1-6 (273430)                                                                                                                                                                                                                                                                                                                                                                                                                                                                                                                                                                                                                                                                                                                                                                                    |
| 8                               | elderly/ (72373)                                                                                                                                                                                                                                                                                                                                                                                                                                                                                                                                                                                                                                                                                                                                                                                   |
| 9                               | (older adult* or senior* or elder*).mp. (102000)                                                                                                                                                                                                                                                                                                                                                                                                                                                                                                                                                                                                                                                                                                                                                   |
| 10                              | 8 or 9 (102000)                                                                                                                                                                                                                                                                                                                                                                                                                                                                                                                                                                                                                                                                                                                                                                                    |
| 11                              | 7 and 10 (16198)                                                                                                                                                                                                                                                                                                                                                                                                                                                                                                                                                                                                                                                                                                                                                                                   |
| 12                              | guidelines/ (67560)                                                                                                                                                                                                                                                                                                                                                                                                                                                                                                                                                                                                                                                                                                                                                                                |
| 13                              | (guideline* or consensus development).mp. (119621)                                                                                                                                                                                                                                                                                                                                                                                                                                                                                                                                                                                                                                                                                                                                                 |
| 14                              | 12 or 13 (119621)                                                                                                                                                                                                                                                                                                                                                                                                                                                                                                                                                                                                                                                                                                                                                                                  |
| 15                              | 11 and 14 (1010)                                                                                                                                                                                                                                                                                                                                                                                                                                                                                                                                                                                                                                                                                                                                                                                   |
| <b>Database: Web of Science</b> |                                                                                                                                                                                                                                                                                                                                                                                                                                                                                                                                                                                                                                                                                                                                                                                                    |
| 1                               | TS=((sedentary lifestyle* or sedentary life style* or sedentary time* or sedentary behavior?r* or physical inactivit* or obes* or overweight* or exercise* or physical activit* or physical inactivit*))                                                                                                                                                                                                                                                                                                                                                                                                                                                                                                                                                                                           |
| 2                               | TS=((guideline* or consensus development conference*))                                                                                                                                                                                                                                                                                                                                                                                                                                                                                                                                                                                                                                                                                                                                             |
| 3                               | #2 AND #1                                                                                                                                                                                                                                                                                                                                                                                                                                                                                                                                                                                                                                                                                                                                                                                          |
| 4                               | TS=((older adult* or senior* or elder*))                                                                                                                                                                                                                                                                                                                                                                                                                                                                                                                                                                                                                                                                                                                                                           |
| 5                               | #4 AND #3                                                                                                                                                                                                                                                                                                                                                                                                                                                                                                                                                                                                                                                                                                                                                                                          |
| <b>Database: CINHALL</b>        |                                                                                                                                                                                                                                                                                                                                                                                                                                                                                                                                                                                                                                                                                                                                                                                                    |
| S1                              | (MH "Life Style, Sedentary+")                                                                                                                                                                                                                                                                                                                                                                                                                                                                                                                                                                                                                                                                                                                                                                      |
| S2                              | MH "Automobile Driving" OR MH "Television" OR "video gaming" OR "video game" OR "computer gaming" OR "video game time" OR "computer game" OR MH "Computers and Computerization Utilization" OR MH "Video Games" OR "screen time" OR "screen entertainment" OR "screen behavior" OR "screen behavior" OR "screen-based entertainment" OR "television viewing" OR "television time" OR "TV viewing" OR "TV watching" OR "TV time" OR "watch television" OR "view television" OR "watchTV" OR "screen watching" OR "screen time" OR "screen entertainment" OR "screen behavior" OR "screen behavior" OR "screen-based entertainment" OR "sedentary behavior" OR "sedentary behavior" OR "sedentary lifestyle" OR "prolonged sitting" OR "sitting time" OR "lying time" OR MH "Life Style, Sedentary+" |
| S3                              | (MH "Obesity+")                                                                                                                                                                                                                                                                                                                                                                                                                                                                                                                                                                                                                                                                                                                                                                                    |
| S4                              | (obes* or overweight)                                                                                                                                                                                                                                                                                                                                                                                                                                                                                                                                                                                                                                                                                                                                                                              |
| S5                              | (MH "Exercise+")                                                                                                                                                                                                                                                                                                                                                                                                                                                                                                                                                                                                                                                                                                                                                                                   |
| S6                              | S1 OR S2 OR S3 OR S4 OR S5 OR S6                                                                                                                                                                                                                                                                                                                                                                                                                                                                                                                                                                                                                                                                                                                                                                   |
| S7                              | (MH "Practice Guidelines")                                                                                                                                                                                                                                                                                                                                                                                                                                                                                                                                                                                                                                                                                                                                                                         |
| S9                              | (MH "Consensus")                                                                                                                                                                                                                                                                                                                                                                                                                                                                                                                                                                                                                                                                                                                                                                                   |
| S10                             | PT practice guidelines                                                                                                                                                                                                                                                                                                                                                                                                                                                                                                                                                                                                                                                                                                                                                                             |
| S11                             | S8 OR S9 OR S10                                                                                                                                                                                                                                                                                                                                                                                                                                                                                                                                                                                                                                                                                                                                                                                    |
| S12                             | S7 AND S11                                                                                                                                                                                                                                                                                                                                                                                                                                                                                                                                                                                                                                                                                                                                                                                         |

|            |                                     |
|------------|-------------------------------------|
| <b>S13</b> | (MH “Aged+”)                        |
| <b>S14</b> | (older adult* or senior* or elder*) |
| <b>S15</b> | S13 OR S14                          |
| <b>S16</b> | S12 AND S15                         |
